# Supplementary material for: Identification and quantification of phytoprostanes and phytofurans of coffee and cocoa by- and co-products
Source: Royal Society of Chemistry journal article supplement (doi:10.1039/c9fo01528k), 2019-01-01
Supplement: c9fo01528k1.pdf [file c9fo01528k1.pdf]

Supplementary material

## **Identification and quantification of phytoprostanes and phytofurans of coffee and cocoa by- and co-products**

Mariana Ruesgas-Ramón<sup>a</sup>, Maria Cruz Figueroa-Espinoza<sup>a,\*</sup>, Erwann Durand<sup>a,b</sup>, Mirna L. Suárez Quiroz<sup>c</sup>, Óscar González Ríos<sup>c</sup>, Amandine Rocher<sup>d</sup>, Guillaume Reversat<sup>d</sup>, Joseph Vercauteren<sup>d</sup>, Camille Oger<sup>d</sup>, Jean-Marie Galano<sup>d</sup>, Thierry Durand<sup>d</sup>, Claire Vigor<sup>d,\*</sup>.

<sup>a</sup> IATE, Univ Montpellier, CIRAD, INRA, Montpellier SupAgro, Montpellier, France.

<sup>b</sup> CIRAD, UMR IATE, F-34398 Montpellier, France.

<sup>c</sup> Tecnológico Nacional de México/Instituto Tecnológico de Veracruz. UNIDA, Miguel Ángel de Quevedo N° 2779, 91860 Veracruz, Veracruz, México.

<sup>d</sup> Institut des Biomolécules Max Mousseron, IBMM, University of Montpellier, CNRS, ENSCM, Faculty of Pharmacy, Montpellier, France.

### **\*Corresponding authors:**

C.V. E-mail: [claire.vigor@umontpellier.fr](mailto:claire.vigor@umontpellier.fr)

M.C.F.-E. E-mail: [maria.figueroa@supagro.fr](mailto:maria.figueroa@supagro.fr)

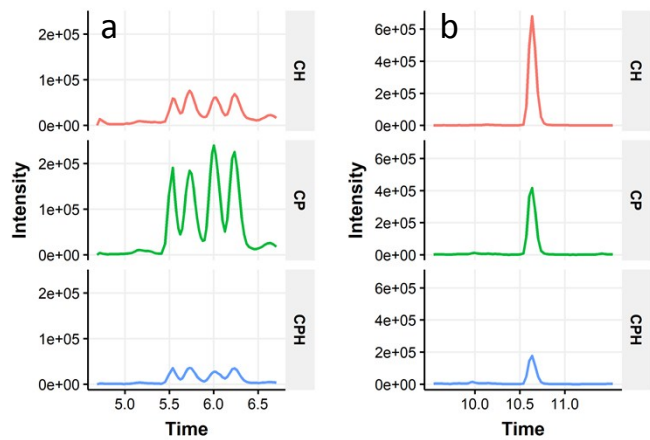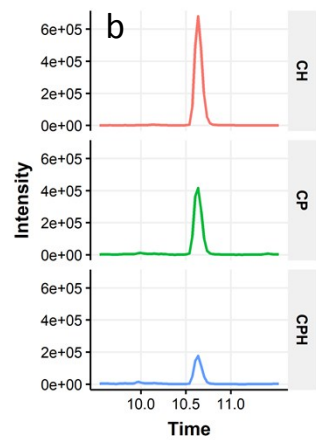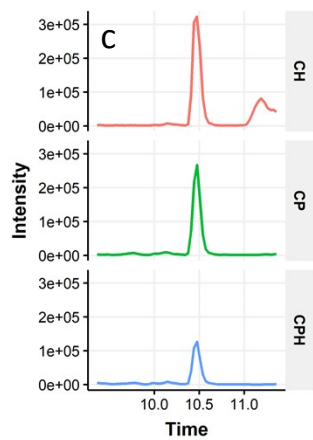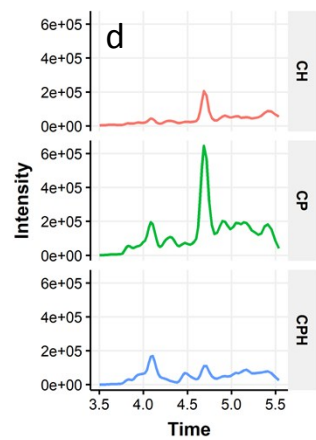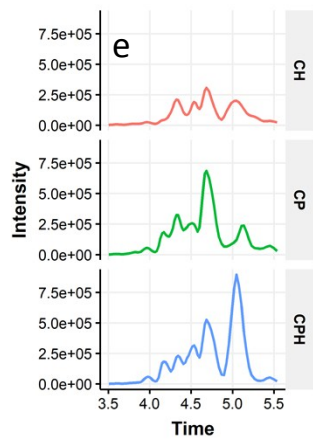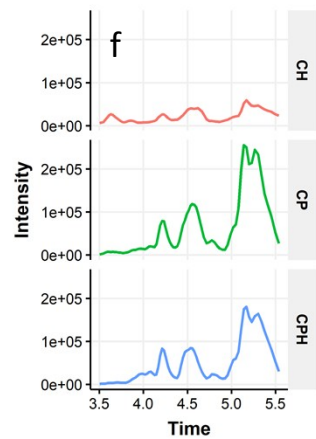

a) *ent*-16-F<sub>1t</sub>-PhytoP, *ent*-16-*epi*-16-F<sub>1t</sub>-PhytoP, 9-F<sub>1t</sub>-PhytoP, 9-*epi*-9-F<sub>1t</sub>-PhytoP

b) *ent*-9-L<sub>1t</sub>-PhytoP

c) *ent*-16-B<sub>1t</sub>-PhytoP

d) *ent*-16(*RS*)-13-*epi*-ST-Δ<sup>14</sup>-9-PhytoF

e) *ent*-16(*RS*)-9-*epi*-ST-Δ<sup>14</sup>-10-PhytoF

f) *ent*-9(*RS*)-12-*epi*-ST-Δ<sup>10</sup>-13-PhytoF

**Fig. 1.** : Chromatograms acquisition of multiple reaction monitoring (MRM) transitions with “Scheduled MRM mode”

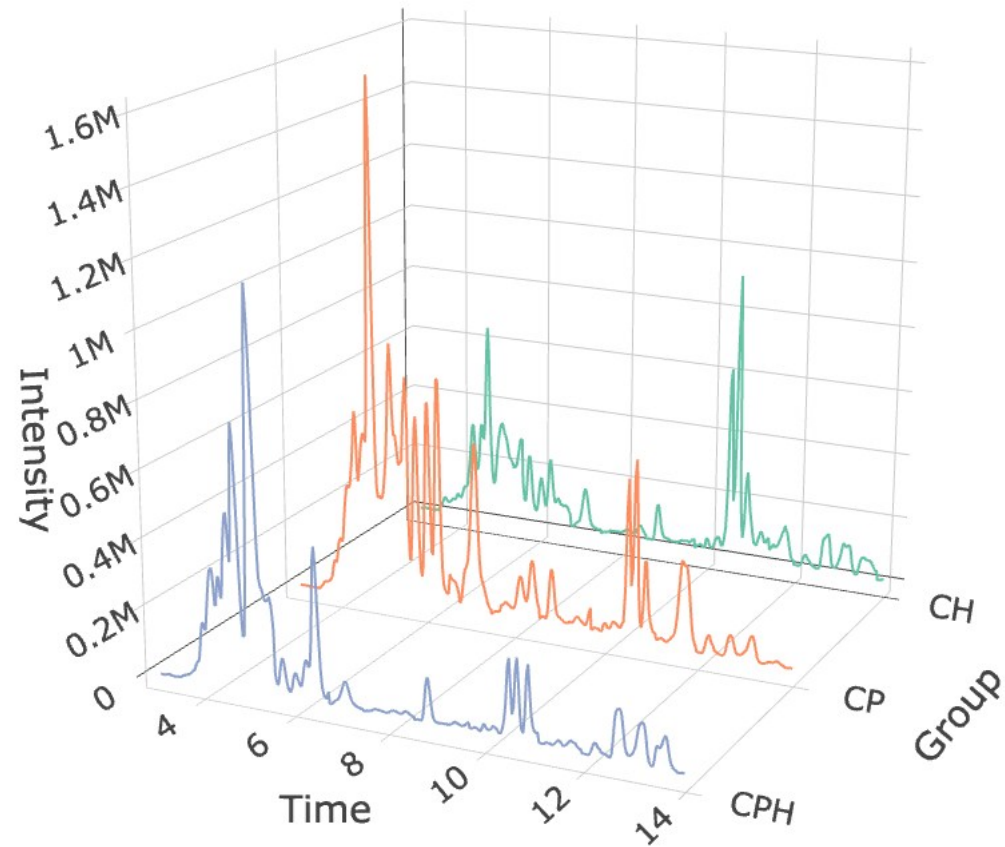

**Fig. 2.** Total ion current chromatograms of the selected daughter ion mass spectra obtained during micro LC-MS/MS
